# Supplementary material
Source: publisher figshare collection journal article supplement (https://acs.figshare.com/ndownloader/files/3860986)
Supplement: Supplementary file 1 [file 3860986]

## Sheet: Cover page-SI
Supplementary Information
Including Indoor Offgassed Emissions in the Life Cycle Inventories of Wood Products
Abhishek Chaudhary 1*, Stefanie Hellweg 1
1ETH Zurich, Institute of Environmental Engineering, 8093 Zurich, Switzerland
									* E-mail: abhishek@ifu.baug.ethz.ch; phone: +41-44-633-02-54; fax: +41-44-633-10-61
Environmental Science and Technology
This file contains:
Table S1: Steady state emission factors(in µg/m2h) of VOCs emitted from wood products and their statistical distribution.
Table S2. USEtox human health effect factors and characterization factors for the compouds emitted from wooden boards analyzed in this study. Lowest concentration of interest (LCI) of individual VOCs imported from AgBB 2012 report is also presented.
Table S3. Various source emission models used to predict the long term VOC emission behavior of wood products.
Table S4. Published studies reporting long term decay behavior of VOCs emitted from wooden products. The Goodness of fit (R2 and RMSE) values are calculated by fitting (non-linear regression) each of the 8 source models presented in Table S3 to each dataset.
Table S5. Emission decay profile of each VOC emitted from five wood products. Distributions of model parameters are derived from fitting the dual 1st order decay source model to 54 datasets mentioned in Table S4.
Table S6. Use stage inventory data for all five products calculated using Eq. (3) in the main text. Mass of all the VOCs, emitted from the per unit area of the product over a service life of 40 years, with the 95% confidence interval in the values is provided.
Table S7. Effectiveness of various barriers in reducing the VOC emissions from wood based products.
Table S8. Results from the LCA of a 1 m3 wooden boards using Simapro software (v. 7.3.3) with Ecoinvent 2.2 inventory database and USEtox impact assessment method.
Table S9. Factors influencing VOC emission from wood based products
Figure S1. Fitting 8 different decay models to chamber testing data on particlboard formaldehyde emissions (Brown 1999).
Figure S2. Formaldehyde emission factor decay profile (E vs. t) for five wooden products as derived from mean dual first order decay model parameters given in Table S5.
Additional References

## Sheet: Table S1
Table S1: Steady state emission factors(in µg/m2h) of VOCs emitted from wood products and their statistical distribution.
VOC	PBD	MDF	OSB	PLY	Solid Wood
Formaldehyde	150log-N(214, 2.4)	31log-N (138, 3.3)	9log-N (23.5, 2.9)	51log-N (49, 3.6)	25log-N (8.7, 2.27)
Acetaldehyde	27log-N (8, 1.7)	3log-N (42, 1.46)	2log-N (106, 1.6)	2log-N (14, 1.2)	8log-N (12.3, 26.8)
Hexanal	42log-N (48, 9.76)	22log-N (173, 5.2)	12log-N (269, 2.9)	12log-N (23, 4.3)	14log-N (38, 6)
Pentanal	40log-N (8.7, 6.6)	20log-N (8.7, 12.5)	12log-N (48, 2.3)	10log-N (11.3, 3.25)	13log-N (7.6, 6.4)
Heptanal	27log-N (32, 1.86)	20log-N (4.3, 6.8)	5log-N (3.5, 4)	5log-N (3.36, 2.44)	4log-N (1.07, 1.7)
Butanal	n/f	2log-N (0.25, 5)	5log-N (14, 2.9)	2log-N (3.46, 1.32)	6log-N (2.4, 3)
Decanal	n/f	2log-N (0.1, 3)	2log-N (5.2, 2.9)	2log-N (9.2, 1.7)	4log-N (6, 2.4)
Benzaldehyde	28log-N (53, 2.76)	20log-N (11.9, 7.4)	6log-N (3.4, 6)	2log-N (5.5, 1.05)	8log-N (2.8, 3.8)
Octanal	28log-N (51, 2.1)	20log-N (7.9, 7.7)	3log-N (3.1, 4.1)	5log-N (7.7, 3.6)	5log-N (2.3, 2.9)
Nonanal	30log-N (35, 2.3)	20log-N (9, 7)	9log-N (10.7, 3.3)	7log-N (12.4, 3.5)	6log-N (5.8, 2)
t-2 Octenal	29log-N (30.4, 1.9)	19log-N (6.2, 6.5)	4log-N (13, 1.24)	3log-N (15, 1.6)	n/f
Ethylene Glycol	3log-N (168, 1.2)	3log-N (229, 1.26)	n/f	n/f	n/f
α-Pinene	40log-N (56, 3)	5log-N (0.016, 2.8)	12log-N (79, 6.6)	12log-N (152, 3)	12log-N (735, 4.8)
β-Pinene	25log-N (1.5, 6)	5log-N (0.019, 3.64)	6log-N (14, 10.2)	4log-N (47, 1.6)	6log-N (96, 7)
α-Terpinene	n/f	n/f	n/f	2log-N (9.6, 1.24)	2log-N (1.5, 12)
Gamma-Terpinene	n/f	n/f	n/f	2log-N (0.6, 2.9)	2log-N (1.06, 10.3)
3-Carene	10log-N (20, 2.4)	4log-N (0.045, 10.2)	12log-N (37, 6)	13log-N (69, 4)	5log-N (22, 3.3)
Limonene	10log-N (25, 3.1)	5log-N (0.5, 6)	6log-N (4.1, 4.9)	7log-N (22, 3)	7log-N (27, 17.5)
Camphene	3log-N (24, 3.5)	n/f	6log-N (1.25, 7)	5log-N (6.6, 2.7)	3log-N (56, 33)
Toluene	10log-N (15, 1.6)	4log-N (13.5, 4.4)	2log-N (1.7, 2)	5log-N (17, 9.9)	6log-N (3.5, 5.5)
p-Cymene	n/f	n/f	n/f	3log-N (9.5, 3.7)	2log-N (1, 10)
m,p Xylene	n/f	n/f	n/f	3log-N (13.8, 2.9)	n/f
Ethylbenzene	n/f	2log-N (0.1, 3.1)	2log-N (0.4, 1.8)	5log-N (2.3, 30)	6log-N (1.7, 14.5)
1-pentanol	4log-N (35, 1.7)	n/f	5log-N (5, 1)	n/f	n/f
Acetone	11log-N (300, 2)	6log-N (30, 2.56)	8log-N (108, 3.4)	2log-N (10.4, 1.5)	6log-N (22, 3.9)
n-heptane	2log-N (0.5, 7)	3log-N (14, 9.5)	2log-N (2, 2)	2log-N (0.7, 1.4)	2log-N (0.14, 2.7)
Linalyl Propanoate
	2log-N (0.6, 8)	2log-N (12.6, 1.26)	n/f	n/f	n/f
Hexanoic Acid	n/f	n/f	11log-N (52, 2.4)	2log-N (0.44, 6.7)	3log-N (4.3, 26.5)
Acetic Acid	n/f	3log-N (46, 3.25)	5log-N (65, 3.3)	2log-N (16, 1.2)	3log-N (76, 2)
Butyl acetate	n/f	n/f	n/f	3log-N (164, 21.5)	2log-N (0.25, 4.9)

## Sheet: Table S2
Table S2. USEtox human health effect factors and characterization factors for the compouds emitted from wooden boards analyzed in this study. Lowest concentration of interest (LCI) of individual VOCs imported from AgBB 2012# report is also presented.
Substance	CAS#		EFcanc. (cases/kgintake)	EFnon-canc. (cases/kgintake)	aEF in DALYs/Kg	CFoutdoor in DALYs/Kg	LCI (μg/m3)
Formaldehyde	50-00-0		1.06131	0.008471	12.23c	0.0001	100
	75-07-0		0.007492	0.038451	0.19
Acetaldehyde						1.73e-06	5200
	66-25-1		n/ab	n/a
Hexanal					n/a	n/a	890
			n/a	n/a
Pentanal	110-62-3				n/a	n/a	1700
Heptanal	111-71-7		n/a	n/a	n/a	n/a	1000
	123-72-8		n/a	n/a
Butanal					n/a	n/a	2800
Decanal	112-31-2		n/a	n/a	n/a	n/a	1400
	100-52-7		0.00137	0.001777	0.02
Benzaldehyde						1.88e-07	90
Octanal	124-13-0		n/a	n/a	n/a	n/a	1100
Nonanal	124-19-6		n/a	n/a	n/a	n/a	1300
t-2 Octenal	2548-87-0		n/a	n/a	n/a	n/a	18
					0.001715
Ethylene Glycol	107-21-1
			n/a	0.000635		2.65e-08	490
α-Pinene	80-56-8		n/a	n/a	n/a	n/a	1500
β-Pinene	127-91-3		n/a	n/a	n/a	n/a	1500
α-Terpinene	99-86-5		n/a	n/a	n/a	n/a	1500
Gamma-Terpinene			n/a	n/a	n/a	n/a
	99-85-4						1500
3-Carene	13466-78-9		n/a	n/a	n/a	n/a	1500
	138-86-3		n/a	n/a
Limonene					n/a	n/a	1500
Camphene	79-92-5		n/a	n/a	n/a	n/a	1500
	108-88-3		5e-51	0.005495	0.015
Toluene						2.4e-07	1900
p-Cymene	99-87-6		n/a	n/a	n/a	n/a	550
	1330-20-7		0.000368	0.008384	0.027
m,p Xylene						3.47e-07	2200
	100-41-4		0.023585	0.000385	0.27
Ethylbenzene						4.36e-06	4400
1-pentanol	71-41-0		n/a	n/a	n/a	n/a	730
	67-64-1		n/a	0.000282	0.00076
Acetone						1.76e-08	400
n-heptane	142-82-5		n/a	n/a	n/a	n/a	21000
Linalyl Propanoate	144-39-8		n/a	n/a	n/a	n/a	n/a
Hexanoic Acid	142-62-1		n/a	n/a	n/a	n/a
							780
Acetic Acid	64-19-7		n/a	n/a	n/a	n/a	1250
	123-86-4		n/a	n/a
Butyl acetate					n/a	n/a	4800
# AgBB, 2012. Health-Related Evaluation Procedure for Volatile Organic Compounds Emissions (VOC and SVOC) from Building Products. <http://www.umweltbundesamt.de/sites/default/files/medien/377/dokumente/agbb_evaluation_scheme_2012.pdf>.
a) Data was expressed as DALYs using the following transformation factors: 11.5 DALY/CTU for cancerous effects and 2.7 DALY/CTU for non-cancerous effects. (Huijbregts et al 2005).
b) n/a = not available

## Sheet: Table S3
Table S3. Various source emission models used to predict the long term VOC emission behavior of wood products. E0 is the initial emission factor at time, t = 0. a, b, k, k1, k2, k3, k11 and k12 are model parameters.
Model Description	Expression	Reference
First order decay	E(t) = E0e-kt	Dunn (1987)
Dual 1st-order decay	E(t)= E1e-k1t + E2e-k2t	Brown (1999)
Second-order decay	E(t) = E0/(1+k2tE0)	Skaar & Jorgenson (2012)
2.5-order decay	E(t)=E0/(1+1.5ktE00.5)2	Skaar & Jorgenson (2012)
3rd-order decay	E(t)=E0/(1+2k3tE02)(1/2)	Skaar & Jorgenson (2012)
nth-order decay	E(t)=E0/(1+(n-1).k.t.E0n-1)(1/(n-1))	Tichenor et al (1991)
Power law	E(t) = at-b	Won et al (2003)
Log time	E(t) = a + b log(t)	Zinn et al (1989)

## Sheet: Table S4
Table S4. Published studies reporting long term decay behavior of VOCs emitted from wooden products. The Goodness of fit (R2 and RMSE) values are calculated by fitting (non-linear regression) each of the 8 source models presented in Table S3 to each dataset. Values in bold denote the highest R2 and lowest RMSE value among the 8 source models.
Study	VOC	Material	R2/RMSE	1st order	Dual 1st order	2nd order	2.5 order	3 order	n order	Power law	Log time
Bartekova 2006	TVOC	OSB	R2	0.815493	0.815493	0.74588	0.712673	0.682055	0.535279	0.570743	0.672508
			RMSE	11.0714	11.0714	13.2425	14.197	15.0273	15.0273	16.8792	14.6759
Zhu et al 2001	a-pinene	PB	R2	0.989612	0.996051	0.979673	0.926631	0.881096	0.975794	0.991285	0.685539
			RMSE	163.883	73.4455	246.449	522.767	1292.72	1292.72	109.1	655.299
Zhu et al 2001	Hexanal	PB	R2	0.926274	0.953743	0.756486	0.941976	0.896003	0.949522	0.905374	0.952593
			RMSE	373.8	290.77	1201.42	333.883	2426.03	2426.03	421.521	294.05
Zhu et al 2001	Limonene	PB	R2	0.987837	0.995998	0.993336	0.965138	0.931226	0.980074	0.992423	0.75777
			RMSE	29.8988	13.8287	29.8203	83.7381	119.315	119.315	19.7701	106.528
Brown 1999	Formaldehyde	PB Room	R2	0.74987	0.984322	0.90868	0.942651	0.802635	0.926943	0.947799	0.987794
			RMSE	43.421	10.759	30.2278	23.6669	186.982	186.982	19.8329	9.49289
Brown 1999	Formaldehyde	PB 1	R2	0.898038	0.965624	0.904629	0.90599	0.906167	0.905715	0.858671	0.879387
			RMSE	8.24674	4.78866	7.97538	7.91781	7.91066	7.91066	9.71282	8.96837
Brown 1999	Formaldehyde	PB 2	R2	0.926809	0.983883	0.960961	0.971228	0.977485	0.969681	0.966349	0.978301
			RMSE	6.68939	3.12733	4.91373	4.21595	3.71601	3.71601	4.52314	3.6287
Brown 1999	Formaldehyde	PB 3	R2	0.930902	0.99166	0.955874	0.964858	0.971387	0.95887	0.953666	0.971489
			RMSE	8.10096	2.80974	6.49423	5.79875	5.22726	5.22726	6.63033	5.1948
Brown 1999	Formaldehyde	MDF1	R2	0.512882	0.512882	0.506884	0.503696	0.5004	0.502605	0.128244	0.134642
			RMSE	6.79083	6.79083	6.83296	6.85542	6.8787	6.8787	9.0848	9.051
Brown 1999	Formaldehyde	MDF2	R2	0.811495	0.811495	0.809176	0.80754	0.805604	0.800458	0.446807	0.465876
			RMSE	4.2309	4.2309	4.25695	4.27531	4.29703	4.29703	7.24917	7.12183
Brown 1999	Formaldehyde	MDF3	R2	0.965952	0.972927	0.967813	0.968072	0.967902	0.967869	0.789543	0.815984
			RMSE	2.57162	2.29312	2.50031	2.49021	2.49691	2.49691	6.39683	5.9783
Wiglusz 2002	Formaldehyde	PB	R2	0.806107	0.98996	0.910625	0.944788	0.966425	0.961767	0.940521	0.970864
			RMSE	11.1272	2.49943	7.93413	6.34847	4.94725	4.94725	6.11956	4.25781
Molhave 1994	Formaldehyde	Furniture	R2	0.582944	0.837213	0.604365	0.613754	0.623149	0.610431	0.743549	0.728778
			RMSE	8.51827	5.32009	8.29981	8.20268	8.10545	8.10545	6.67779	6.86707
Won et al 2008	Formaldehyde	OSB	R2	0.599903	0.826298	0.634539	0.652867	0.671874	0.795894	0.791805	0.77296
			RMSE	0.282525	0.186051	0.270514	0.264045	0.257227	0.257227	0.203721	0.212706
Won et al 2008	Pentanal	OSB	R2	0.990645	0.994055	0.972199	0.94946	0.923702	0.912853	0.904427	0.970843
			RMSE	1.31517	0.966833	2.34719	3.3027	4.15431	4.15431	4.01394	2.14102
Won et al 2008	Hexanal	OSB	R2	0.977855	0.9921	0.989643	0.977352	0.985221	0.984847	0.968463	0.969712
			RMSE	8.52643	4.39816	5.48173	8.94218	38.4829	38.4829	9.21376	8.60038
Won et al 2008	Acetaldehyde	OSB	R2	0.992585	0.996221	0.981956	0.980021	0.983931	0.98109	0.967269	0.939988
			RMSE	1.6835	0.981782	2.43965	4.14641	6.66038	6.66038	3.0223	3.9122
Won et al 2008	Propanal	OSB	R2	0.978089	0.978089	0.940951	0.914655	0.887178	0.864653	0.858509	0.931064
			RMSE	1.21979	1.21979	2.17921	2.71591	3.19182	3.19182	3.17153	2.14955
Won et al 2008	Butanal	OSB	R2	0.953928	0.984218	0.965887	0.961584	0.952895	0.916447	0.918303	0.967919
			RMSE	0.600802	0.353088	0.517435	0.555488	0.624168	0.624168	0.804283	0.500506
Zinn 1990	Formaldehyde	PB1	R2	0.959387	0.987718	0.992149	0.988296	0.880591	0.991083	0.923202	0.985669
			RMSE	24.8969	13.526	10.742	13.7232	208.749	208.749	34.0658	14.4858
Zinn 1990	Formaldehyde	PB2	R2	0.318028	0.881969	0.37263	0.412549	0.82272	0.573688	0.7352	0.656589
			RMSE	41.3489	17.1854	39.8532	38.8232	105.983	105.983	25.8125	29.3136
Zinn 1990	Formaldehyde	PB3	R2	0.678743	0.924108	0.774375	0.81295	0.89744	0.859553	0.91364	0.90008
			RMSE	13.5746	6.55867	11.5159	10.5409	36.0673	36.0673	6.99651	7.52565
Zinn 1990	Formaldehyde	PB4	R2	0.844748	0.929817	0.909424	0.91549	0.754702	0.905198	0.835362	0.890302
			RMSE	19.3368	12.8163	14.6703	14.0671	67.2847	67.2847	19.7015	16.0231
Zinn 1990	Formaldehyde	PB5	R2	0.841966	0.977362	0.820463	0.968206	0.938223	0.977416	0.968279	0.974735
			RMSE	43.1909	16.1167	163.038	20.1472	315.062	315.062	19.1905	17.0262
Zinn 1990	Formaldehyde	PB7	R2	0.741154	0.976062	0.848281	0.832795	0.903873	0.913162	0.912222	0.896838
			RMSE	40.6499	12.3399	165.682	33.2354	300.169	300.169	23.6263	25.6127
Zinn 1990	Formaldehyde	PB8	R2	0.874239	0.874239	0.829685	0.805773	0.531046	0.694776	0.635326	0.729907
			RMSE	25.5529	25.5529	30.3045	32.7301	70.1043	70.1043	43.6026	37.3138
Zinn 1990	Formaldehyde	PB10	R2	0.812019	0.980605	0.852344	0.873065	0.884225	0.843563	0.944103	0.954272
			RMSE	17.1768	5.51308	15.2865	14.2236	99.2693	99.2693	9.36429	8.46258
Zinn 1990	Formaldehyde	PB11	R2	0.694331	0.979267	0.744297	0.773963	0.962551	0.737014	0.966524	0.943455
			RMSE	16.4395	4.27723	15.1119	14.2901	76.479	76.479	5.43869	7.06358
Zinn 1990	Formaldehyde	PB12	R2	0.739546	0.938388	0.786723	0.812593	0.903751	0.784531	0.926598	0.917127
			RMSE	16.6539	8.0914	15.1368	14.2509	71.6084	71.6084	8.83157	9.38408
Zinn 1990	Formaldehyde	PB13	R2	0.780626	0.968899	0.831613	0.856389	0.925472	0.82662	0.958389	0.954336
			RMSE	11.8278	4.44597	10.4196	9.66414	47.7316	47.7316	5.14266	5.38696
Zinn 1990	Formaldehyde	PB14	R2	0.6717	0.989889	0.799653	0.852234	0.890867	0.966552	0.962195	0.923885
			RMSE	15.4807	2.69839	12.4341	10.8077	9.32806	9.32806	5.22858	7.40358
Zinn 1990	Formaldehyde	PB15	R2	0.705388	0.912114	0.797051	0.829531	0.839347	0.837388	0.863805	0.863206
			RMSE	21.1304	11.4861	17.7456	16.2682	68.5492	68.5492	14.2995	14.3299
Zinn 1990	Formaldehyde	PB16	R2	0.983894	0.985256	0.982015	0.967655	0.806977	0.985587	0.8671	0.929457
			RMSE	9.25733	8.7876	9.87205	13.508	100.064	100.064	26.3683	19.1291
Skaar 2012	Formaldehyde	Chair	R2	0.936798	0.995916	0.949572	0.950226	0.947444	0.950846	0.797822	0.86435
			RMSE	8.28111	2.10477	7.39149	7.34439	7.57701	7.57701	14.8542	12.1194
Skaar 2012	Acetaldehyde	Chair	R2	0.974133	0.991174	0.983663	0.983953	0.975015	0.936776	0.97781	0.771077
			RMSE	1.65239	0.944572	1.37204	3.69217	3.92488	3.92488	1.5508	4.77093
Skaar 2012	Acetone	Chair	R2	0.793705	0.982554	0.905502	0.930039	0.940677	0.948941	0.942476	0.906492
			RMSE	4.04234	1.17196	2.74558	2.31813	2.12393	2.12393	2.10253	2.66439
Skaar 2012	Isobutanol	Chair	R2	0.995797	0.997229	0.979229	0.960471	0.701506	0.970414	0.813351	0.953169
			RMSE	20.2642	16.7824	54.4564	75.2553	342.162	342.162	137.732	67.2586
Skaar 2012	1-butanol	Chair	R2	0.991037	0.996032	0.989891	0.976295	0.659132	0.987998	0.808672	0.936161
			RMSE	34.7651	19.2688	35.2573	55.8045	402.452	402.452	136.279	77.2867
Skaar 2012	M2P	Chair	R2	0.993267	0.993267	0.96804	0.947066	0.924652	0.897983	0.700237	0.838731
			RMSE	3.48678	3.48678	8.6154	11.3079	13.6529	13.6529	23.59	17.0625
Skaar 2012	Butylacetate	Chair	R2	0.97929	0.995811	0.997327	0.991413	0.979006	0.968271	0.937173	0.981019
			RMSE	8.4993	3.44363	2.8503	5.85881	9.28916	9.28916	13.6751	7.26358
Skaar 2012	Xylene	Chair	R2	0.912789	0.91279	0.861056	0.834313	0.806904	0.8205	0.771674	0.815423
			RMSE	1.90163	1.90163	2.49333	2.7705	3.01954	3.01954	3.09679	2.72821
Skaar 2012	Cyclohexanone	Chair	R2	0.986784	0.988591	0.963263	0.942762	0.920354	0.734319	0.758809	0.909307
			RMSE	0.606641	0.54813	1.14347	1.43933	1.70382	1.70382	2.56623	1.54348
Skaar 2012	n-decane	Chair	R2	0.971236	0.971236	0.938696	0.91766	0.89628	0.791543	0.762438	0.898061
			RMSE	0.285723	0.285723	0.444932	0.518693	0.584238	0.584238	0.80409	0.518001
Skaar 2012	Dichlorobenzene	Chair	R2	0.948022	0.94802	0.891257	0.863693	0.837804	0.628289	0.632793	0.774756
			RMSE	0.535064	0.535064	0.799736	0.90058	0.987218	0.987218	1.35152	1.04544
Skaar 2012	Limonene	Chair	R2	0.959586	0.986105	0.935086	0.917637	0.898997	0.811967	0.778345	0.911402
			RMSE	0.322788	0.208094	0.434819	0.497033	0.556177	0.556177	0.754517	0.468327
Skaar 2012	n-Undecane	Chair	R2	0.967452	0.982153	0.971796	0.960563	0.944612	0.879799	0.857871	0.971786
			RMSE	0.757551	0.564769	0.765408	0.956667	1.16431	1.16431	1.62684	0.703586
Skaar 2012	2-ethylhexyl acetate	Chair	R2	0.879005	0.994843	0.91229	0.923512	0.931192	0.938386	0.892101	0.943519
			RMSE	19.1518	3.95022	16.3587	15.2557	14.4358	14.4358	18.1424	13.0535
Skaar 2012	n-Dodecane	Chair	R2	0.889642	0.992828	0.920648	0.92828	0.931997	0.861451	0.877798	0.93816
			RMSE	0.609642	0.155067	0.516916	0.490197	0.476953	0.476953	0.643713	0.454793
Skaar 2012	Ethylbenzene	Chair	R2	0.952284	0.997963	0.979667	0.976477	0.96643	0.965278	0.918277	0.998904
			RMSE	0.441786	0.0985047	0.294045	0.339689	0.42422	0.42422	0.591587	0.066257
Skaar 2012	Toluene	Chair	R2	0.972739	0.997793	0.995211	0.987251	0.972589	0.985352	0.950018	0.963895
			RMSE	0.696263	0.190436	0.307	0.549812	0.805142	0.805142	0.934473	0.759876
Skaar 2012	Butanal	Chair	R2	0.961242	0.999999	0.993724	0.994711	0.993341	0.98588	0.988944	0.907687
			RMSE	0.608115	0.0031484	0.242845	0.260435	0.392174	0.392174	0.350581	0.923966
Skaar 2012	TVOC	Chair	R2	0.969899	0.992194	0.991712	0.98415	0.632266	0.991961	0.80822	0.920647
			RMSE	184.018	85.2273	89.3963	133.814	2677.23	2677.23	428.111	271.729

## Sheet: Table S5
Table S5. Emission decay profile of each VOC emitted from five wood products. Distributions of model parameters are derived from fitting the dual 1st order decay source model to 54 datasets mentioned in Table S4. log-N (l, sg) denotes a log-normally distributed random variable with geometric mean l and geometric standard deviation sg.
Source Model	Model Parameter	Distribution
Dual 1st-order decay	E1 (µg/m2h)	~(F* E2)
E(t)= E1e-k1t + E2e-k2t
	k1 (h-1)	~log-N (0.016, 5.26)
	E2 (µg/m2h)	~Ess
	k2 (h-1)	~log-N(1.9E-04, 3.28)
F ~log-N (5.5, 3)
Ess is the steady state emission factor distribution as given in Table S1 for different VOCs

## Sheet: Table S6
Table S6. Use stage inventory data for all five products calculated using Eq. (3) in the main text. Mass of all the VOCs, emitted from the per unit area of the product over a service life of 40 years, with the 95% confidence interval in the values is provided.
Compartment	VOC	Particleboard			MDF			Plywood			Oriented strand board			Solid wood
			Variability of the values (g/m2)			Variability of the values (g/m2)			Variability of the values (g/m2)			Variability of the values (g/m2)			Variability of the values (g/m2)
		Mass emitted (g/m2)			Mass emitted (g/m2)			Mass emitted (g/m2)			Mass emitted (g/m2)			Mass emitted (g/m2)
		Mean value	2,5th percentile	97,5th percentile	Mean value	2,5th percentile	97,5th percentile	Mean value	2,5th percentile	97,5th percentile	Mean value	2,5th percentile	97,5th percentile	Mean value	2,5th percentile	97,5th percentile
Indoor Air	Formaldehyde	4.104	0.097	22.625	3.303	0.041	21.385	1.212	0.013	8.13	0.496	0.009	3.053	0.147	0.004	0.835
Indoor Air	Acetaldehyde	0.1	0.004	0.511	0.559	0.009	3.149	0.116	0.002	0.623	1.685	0.026	8.92	2.997	0.078	15.983
Indoor Air	Hexanal	7.011	0.077	43.914	8.257	0.026	53.276	0.802	0.005	5.446	5.971	0.102	32.76	2.03	0.004	13.802
Indoor Air	Pentanal	1.067	0.038	5.44	1.888	0.058	10.156	0.259	0.004	1.684	0.825	0.023	4.915	0.297	0.002	2.046
Indoor Air	Heptanal	0.356	0.01	1.919	0.73	0.024	3.883	0.058	0.002	0.331	0.089	0.001	0.606	0.015	0.001	0.076
Indoor Air	Butanal	0	0	0	0.036	0.001	0.2	0.038	0.001	0.205	0.283	0.006	1.759	0.049	0.001	0.298
Indoor Air	Decanal	0	0	0	0.006	0	0.031	0.162	0.002	0.836	0.281	0.004	1.476	0.102	0.003	0.566
Indoor Air	Benzaldehyde	1.054	0.008	6.338	0.835	0.001	5.322	0.036	0.001	0.192	0.094	0.002	0.515	0.064	0.001	0.386
Indoor Air	Octanal	0.975	0.005	6.857	0.709	0.001	4.411	0.218	0.006	1.149	0.044	0.001	0.23	0.036	0.001	0.187
Indoor Air	Nonanal	0.637	0.011	4.041	0.637	0.001	4.33	0.303	0.004	2.031	0.257	0.003	1.663	0.089	0.003	0.454
Indoor Air	t-2 Octenal	0.529	0.02	2.644	0.654	0.023	3.371	0.165	0.002	0.895	0.101	0.002	0.536	0	0	0
Indoor Air	Ethylene Glycol	1.309	0.02	7.053	1.886	0.027	10.314	0	0	0	0	0	0	0	0	0
Indoor Air	α-Pinene	0.888	0.012	5.874	0.001	0	0.003	3.212	0.055	19.362	5.468	0.01	30.001	30.887	0.128	197.766
Indoor Air	β-Pinene	0.034	0	0.224	0.001	0	0.006	0.624	0.039	2.966	0.47	0.007	2.427	7.166	0.139	37.666
Indoor Air	α-Terpinene	0	0	0	0	0	0	0.092	0.001	0.488	0	0	0	1.388	0.021	7.217
Indoor Air	Gamma-Terpinene	0	0	0	0	0	0	0.024	0	0.127	0	0	0	0.707	0.011	3.972
Indoor Air	3-Carene	0.357	0.009	2.135	0.013	0	0.071	2.094	0.016	14.548	1.823	0.005	13.475	0.521	0.008	3.049
Indoor Air	Limonene	1.355	0.006	9.171	0.03	0.001	0.162	0.446	0.008	2.655	0.114	0.002	0.651	4.057	0.063	22.219
Indoor Air	Camphene	1.703	0.034	9.404	0	0	0	0.186	0.003	1.022	0.329	0.005	1.796	3.259	0.049	18.084
Indoor Air	Toluene	0.196	0.01	0.974	0.28	0.004	1.523	0.867	0.013	4.554	0.043	0.001	0.235	0.165	0.002	0.898
Indoor Air	p-Cymene	0	0	0	0	0	0	0.165	0.002	0.857	0	0	0	1.263	0.02	6.743
Indoor Air	m,p Xylene	0	0	0	0	0	0	0.218	0.003	1.205	0	0	0	0	0	0
Indoor Air	Ethylbenzene	0	0	0	0.006	0	0.033	0.502	0.007	2.803	0.008	0	0.044	0.276	0.004	1.489
Indoor Air	1-pentanol	0.36	0.005	1.908	0	0	0	0	0	0	0.032	0	0.181	0	0	0
Indoor Air	Acetone	4.865	0.182	26.479	0.549	0.013	3.217	0.15	0.002	0.799	2.516	0.034	15.482	0.578	0.006	3.834
Indoor Air	n-heptane	0.14	0.002	0.761	0.33	0.006	1.696	0.011	0.001	0.055	0.054	0.002	0.278	0.006	0	0.035
Indoor Air	Linalyl Propanoate	0.133	0.002	0.725	0.125	0.002	0.704	0	0	0	0	0	0	0	0	0
Indoor Air	Hexanoic Acid	0	0	0	0	0	0	0.121	0.002	0.676	0.917	0.026	5.343	0.248	0.003	1.329
Indoor Air	Acetic Acid	0	0	0	1.232	0.053	6.08	0.144	0.002	0.758	2.123	0.062	11.413	1.122	0.06	5.57
Indoor Air	Butyl acetate	0	0	0	0	0	0	6.361	0.313	32.076	0	0	0	0.038	0.001	0.198

## Sheet: Table S7
Table S7. Effectiveness of various barriers in reducing the VOC emissions from wood based products. A value of 90% here means that the mass of each VOC emitted by coated wooden product over its service life is only 10% of the mass emitted by original uncoated product.
Type of coating	Average Barrier Effectiveness	Reference
Acrylate, UV cured Coating	0.87	1Technical Bulletin, North American Composite Panel association
Alcohol sealer Coating	0.87	1Technical Bulletin, North American Composite Panel association
Alkyd Coating	0.87	1Technical Bulletin, North American Composite Panel association
Polyurethane, two component Coating	0.87	1Technical Bulletin, North American Composite Panel association
Polyvinyl acetate Coating	0.87	1Technical Bulletin, North American Composite Panel association
Powder Coatings	0.87	1Technical Bulletin, North American Composite Panel association
High pressure thick laminates	0.87	1Technical Bulletin, North American Composite Panel association
Phenol backer sheets (Thick Laminate)	0.87	1Technical Bulletin, North American Composite Panel association
Polyester low pressure thin laminates	0.87	1Technical Bulletin, North American Composite Panel association
Alkyd primer sealer Coating	0.8	1Technical Bulletin, North American Composite Panel association
Polyurethane Coating	0.8	1Technical Bulletin, North American Composite Panel association
Polyethylene thin laminate films	0.5	1Technical Bulletin, North American Composite Panel association
Thin laminate Foils	0.5	1Technical Bulletin, North American Composite Panel association
Textured nonrecoatable paper laminate	0.77	2Kelly et al 1999
Recoated paper, waterborne topcoat	0.8	2Kelly et al 1999
Paper laminate	0.83	2Kelly et al 1999
Rigid vinyl laminate	0.9	2Kelly et al 1999
Vinyl Coating	0.94	2Kelly et al 1999
Electron-beam-cured acrylic coating	0.98	2Kelly et al 1999
Epoxy powder coating	0.9	3Barry & Corneau 2006
Melamine saturated paper	0.85	3Barry & Corneau 2006
Painted UV topcoat	0.85	3Barry & Corneau 2006
Laminated phenolic paper	0.88	3Barry & Corneau 2006
Vinyl laminate	0.66	3Barry & Corneau 2006
Decorative paper foil	0.86	4Wiglusz et al 2002
Melamine laminate	0.8	5Stachowiak-Wencek et al 2011; Kelly 1999
Finish foils (artificial veneer)	0.75	5Stachowiak-Wencek et al 2011
1http://www.compositepanel.org/education-resources/technical-information.html
2Kelly, T.J., Smith, D.L. and Satola, J. (1999) "Emission rates of formaldehyde from materials and consumer products found in California homes", Environ. Sci. Technol. 33, 81-88.
3Barry, A.; Corneau, D., (2006). Effectiveness of barriers to minimize VOC emissions including formaldehyde. Forest Prod. J., 56 (9), 38-42.
4Wiglusz, R., Nikei, G., Igielska, G., Sitko, E., 2002. Volatile organic compounds emissions from particleboard veneered with decorative paper foil. Holzforschung 56 (1), 108–110.
5Stachowiak-Wencek, A., Pradzynski, W., and Krzywosinska, P., "Investigations on volatile organic compounds (VOC) emissions from wood-based materials." Warsaw University of Life Sciences: 59.

## Sheet: Table S8
Table S8. Results from the LCA of a 1 m3 wooden boards using Simapro software (v. 7.3.3)a with Ecoinvent 2.2b inventory database and USEtox impact assessment method (interim characterization factors considered).
Results for 0.112 m3 of these products as reported in Table 2 of main text is simply obtained by multiplying values below with 0.112.
Impact category	Unit	Particle board, indoor use, at plant/RER U	Medium density fibreboard, RER U	Plywood, indoor use, at plant/RER U	Oriented Strand Board, at plant/RER U	Sawn wood, softwood, raw, air dried, U= 20%, at plant
Human toxicity, cancer	CTUh	1.54e-05	2.88e-05	3.45e-05	1.96e-05	5.64e-06
Human toxicity, non-cancer	CTUh	5.08e-05	9.89e-05	0.000271	7.97e-05	9.3e-06
Total Human Toxicity#	DALYs	0.000314	0.000598	0.00113	0.000441	9e-05
The characterization factor for human toxicity impacts (human toxicity potential) is expressed in comparative toxic units (CTUh), providing the estimated increase in morbidity in the total human population per unit mass of a chemical emitted, assuming equal weighting between cancer and non-cancer due to a lack of more precise insights into this issue. Unit: [CTUh] = [disease cases per kg emitted]
#Data was expressed as DALYs using the following transformation factors: 11.5 DALY/CTUh for cancerous effects and 2.7 DALY/CTUh for non-cancerous effects. (Huijbregts et al 2005).
aProduct Ecology Consultants. (2011). Sima Pro software version 7.3.3. Retrieved from http://www.pre-sustainability.com/simapro-lca-software
becoinvent 2.2 database available at http://www.ecoinvent.org/database/ecoinvent-version-2/
cRosenbaum, R.K., Bachmann, T.M., Hauschild, M.Z., Huijbregts, M.A.J., Jolliet, O., Juraske, R., Kohler, A., Larsen, H.F., MacLeod, M., Margni, M., McKone, T.E., Payet, J., Schuhmacher, M., Russel, A., van de Meent, D., 2007. USEtox – the UNEP/SETAC toxicity model: recommended characterisation factors for human toxicity and freshwater ecotoxicity in Life Cycle Impact Assessment. Int. J. Life Cycl…

## Sheet: Table S9
Table S9. Factors influencing VOC emission from wood based products
Factor	Variables	Wood product	VOC studied	Effect on VOC emission	Reference
Coating	Uncoated and boards coated with paper, vinyl, melamine studied	Particleboard	Formaldehyde	coated boards emitted 10 times less formaldehyde; see table S9	Kelly et al. 1999
	effect of lamination and finish foils as barriers	Particleboard	total 8 VOCs analyzed	63-87% decrease in emissions; see table S9	Wencek et al. 2011
	Three grades of coatings studied for VOC barrier effectiveness	Particleboard & MDF	different VOCs	emission decrease as coating acts as a barrier; see table S9	Technical bulletin, CPA
	decorative paper foil	Particleboard	formaldehyde and other VOCs	paper foil reduced emissions; see table S9	Wiglusz et al. 2002
	10 commonly used wood finishings analyzed	MDF and particleboards	formaldehyde and other VOCs	epoxy coating performed best; see table S9	Barry & Corneau 2006
Type of wood species	dry/green state	Soild wood	Formaldehyde	generally dry tree samples emit higher VOCs than green ones	Meyer & Boehme 1997
	Species type	Soild wood	Formaldehyde	Beech>Spruce>Birch>Pine>Poplar	Bohm et al. 2012
	Species type	Plywood	Formaldehyde	Birch>Beech>Spruce>Pine>Poplar	Bohm et al. 2012
	Species type	Soild wood	Formaldehyde	Oak>Douglas fir>Pine>Spruce>Beech	Meyer & Boehme 1997
	Species type	Particleboard & MDF	Terpenes	Southern pine>Pine>hardwood>Douglus fir	Baumann 1999
	Species type	Soild wood	Formaldehyde	Spruce>Pine>Oak>Poplar>Beech	Weigl et al. 2009
Indoor climatic parameters	Temperature	Particleboard	Formaldehyde	formaldehyde concentration was doubled for each 7°C temperature rise	Andersen 1975
	Relative humidity			concentration doubled when humidity increased from 30% to 70% at 22°C	Andersen 1975
	Ventilation rate			Hyperbolic decrease with increasing ventilation rate	Andersen 1975
	Temperature	Plywood	toluene, n-butyl acetate, ethylbenzene and xylene	Emission rate increases with temperature	Lin 2009
	Relative humidity			Increase with increasing humidity	Lin 2009
	Ventilation rate			Decrease with increasing ventilation rate	Lin 2009
	Temperature	Plywood	Formaldehyde	Increase with increasing temperature	An et al 2010
Board characteristics	thickness	Plywood	Formaldehyde	emission increase with thickness	Bohm et al. 2012
	thickness	OSB	terpens, aldehydes and other VOCs	emission increase with thickness	Ohlmeyer 2008
Adhesive used	Phenol-Resorcinol-Formaldehyde (PRF) and melamine urea formaldhyde (MUF) adhesive	Soild wood	aldehydes, terpenes, aliphatic and aromatic hydrocarbons	emissions from panel bonded with MUF>those with PRF	Funch 2002
	Urea-formaldehyde (UF) vs. Phenol-formaldehyde (PF) adhesive	Plywood	Formaldehyde	boards bonded with UF emitted higher formaldehyde than those with PF	Bohm et al. 2012
	Mole ratio	Particleboard	Formaldehyde	UF>MUF>PF	Que et al. 2007
Manufacturing process	drying temperature	OSB	terpenes, aldehydes, acetone, hexanoic acid	higher drying temperature reduces hexanal emissions	Wilke 2012
	Pressing temperature	OSB	terpenes, aldehydes, acetone, hexanoic acid	boards pressed at 220°C emitted higher terpenes than those at 190°C or 250°C	Wilke 2012

[truncated: 3 more sheets: Figure S1, Figure S2, References]
